# Supplementary material for: Impact of aspect ratio and crystal size distribution of l -glutamic acid formed by cooling crystallization on drying characteristics
Source: Royal Society of Chemistry journal article supplement (doi:10.1039/d4ra05935b), 2025-01-01

## Supplementary Information

### Impact of Aspect Ratio and Crystal Size Distribution of L-Glutamic Acid Formed by Cooling Crystallization on Drying Characteristics

Jong Beom Lee<sup>a</sup>, Yu-Jin Kim<sup>a</sup>, Kwang-Joo Kim<sup>a</sup>, Geon-Hee Kim<sup>b</sup>, Chanmin Lee<sup>c</sup>,

Young Duk Park<sup>d</sup>, Jung-Chul An<sup>e</sup>, Hyenoseok Yi<sup>e</sup>, Kyeong-seok Oh<sup>f</sup>, Joo-Il Park<sup>g\*</sup>

<sup>a</sup>*Department of Chemical & Biological Engineering, Hanbat National University, Daejeon 34158, Republic of Korea*

<sup>b</sup>*Department of Mechanics-Materials Convergence System Engineering, Hanbat National University, Daejeon 34158, Republic of Korea*

<sup>c</sup>*Green and Sustainable Materials R&D Department, Research Institute of Clean Manufacturing System, Korea Institute of Industrial Technology, 89 Yangdaegiro-gil, Ipjangmyeon, Cheonan-si 31056, Republic of Korea*

<sup>d</sup>*Innovation Corporation for Smart Optics, Hanbat National University, Daejeon 34014, Republic of Korea*

<sup>e</sup>*Carbon Materials Research Group, Research Institute of Industrial Science & Technology (RIST), Pohang 11 37673, Republic of Korea*

<sup>f</sup>*Department of Chemical & Biological Engineering, Inha Technical College, Incheon 22212, Republic of Korea*

<sup>g</sup>*Department of Chemical & Biological Engineering, Hanbat National University, Daejeon 34158, Republic of Korea*

*\* Corresponding authors:*

*Tel.: +82 42 8211530, E-mail address: jipark94@hanbat.ac.kr (J. -I Park)*

### Supplementary Information 1.

Metastable zone limit of  $\beta$ -form LGA solution in this study

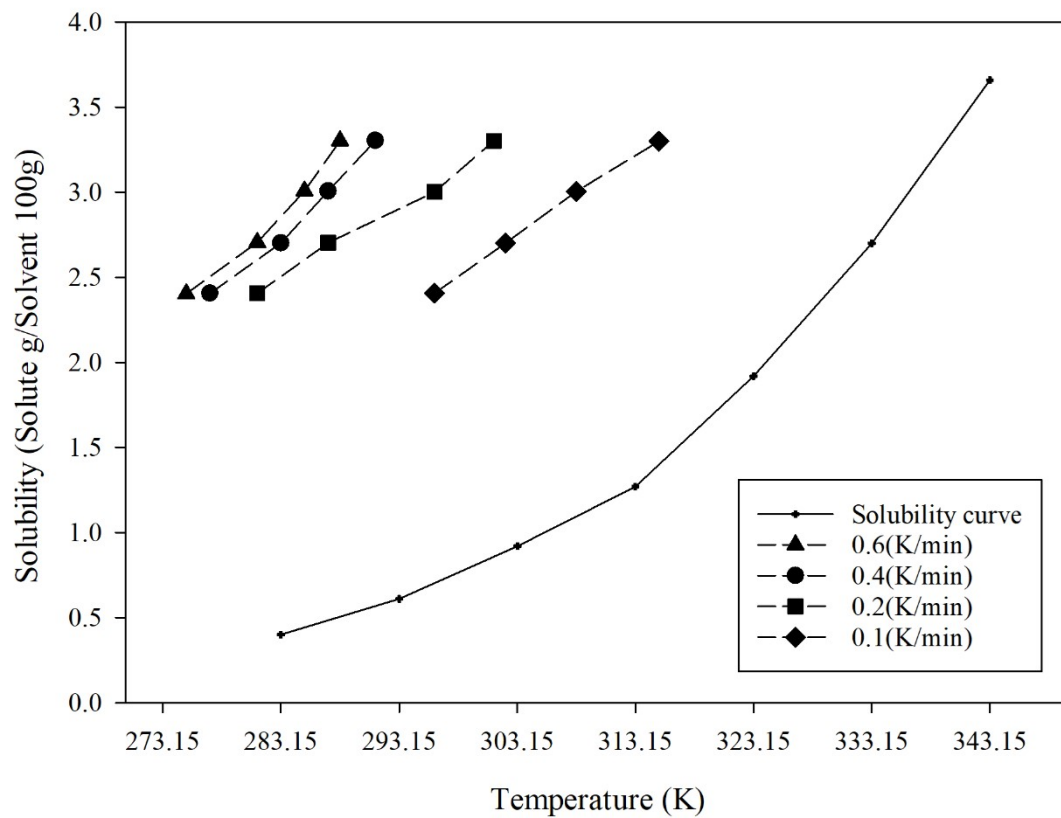

## Supplementary Information 2.

Supersaturation depending on the cooling rate in spontaneous nucleation

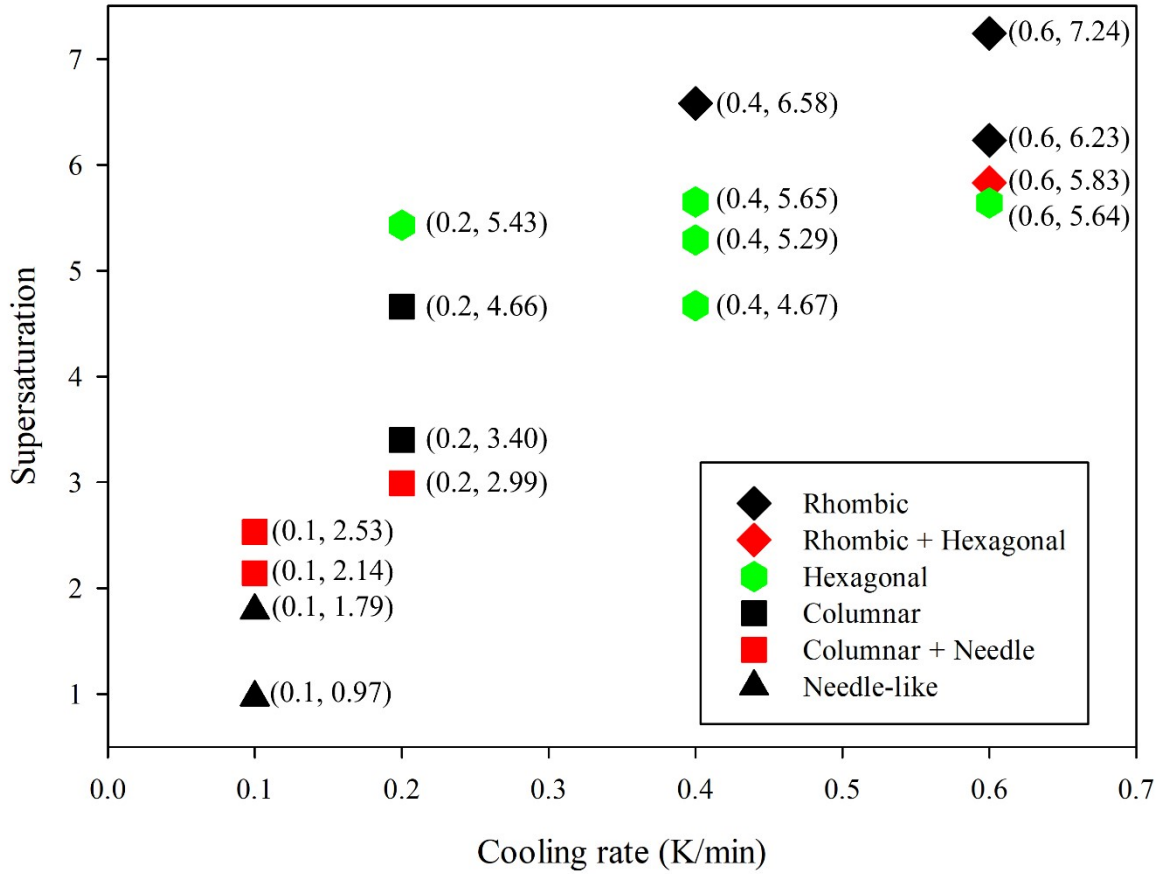

From equation 1 and 2:  $\ln(x_{Solute}) = 11.5344 \ln(T_{SN}) - 72.7282$ ,  $\sigma_{SN} = \frac{C - C_{sat}}{C_{sat}}$

( $T_{SN}$ : Temperature at which spontaneous nucleation occurs,  $\sigma_{SN}$ : Supersaturation of spontaneous nucleation)

### Supplementary Information 3.

OM of crystals according to the cooling rate and supersaturation (a-series: 0.6K/min, b-series: 0.4K/min, c-series: 0.2K/min, d-series: 0.1K/min)

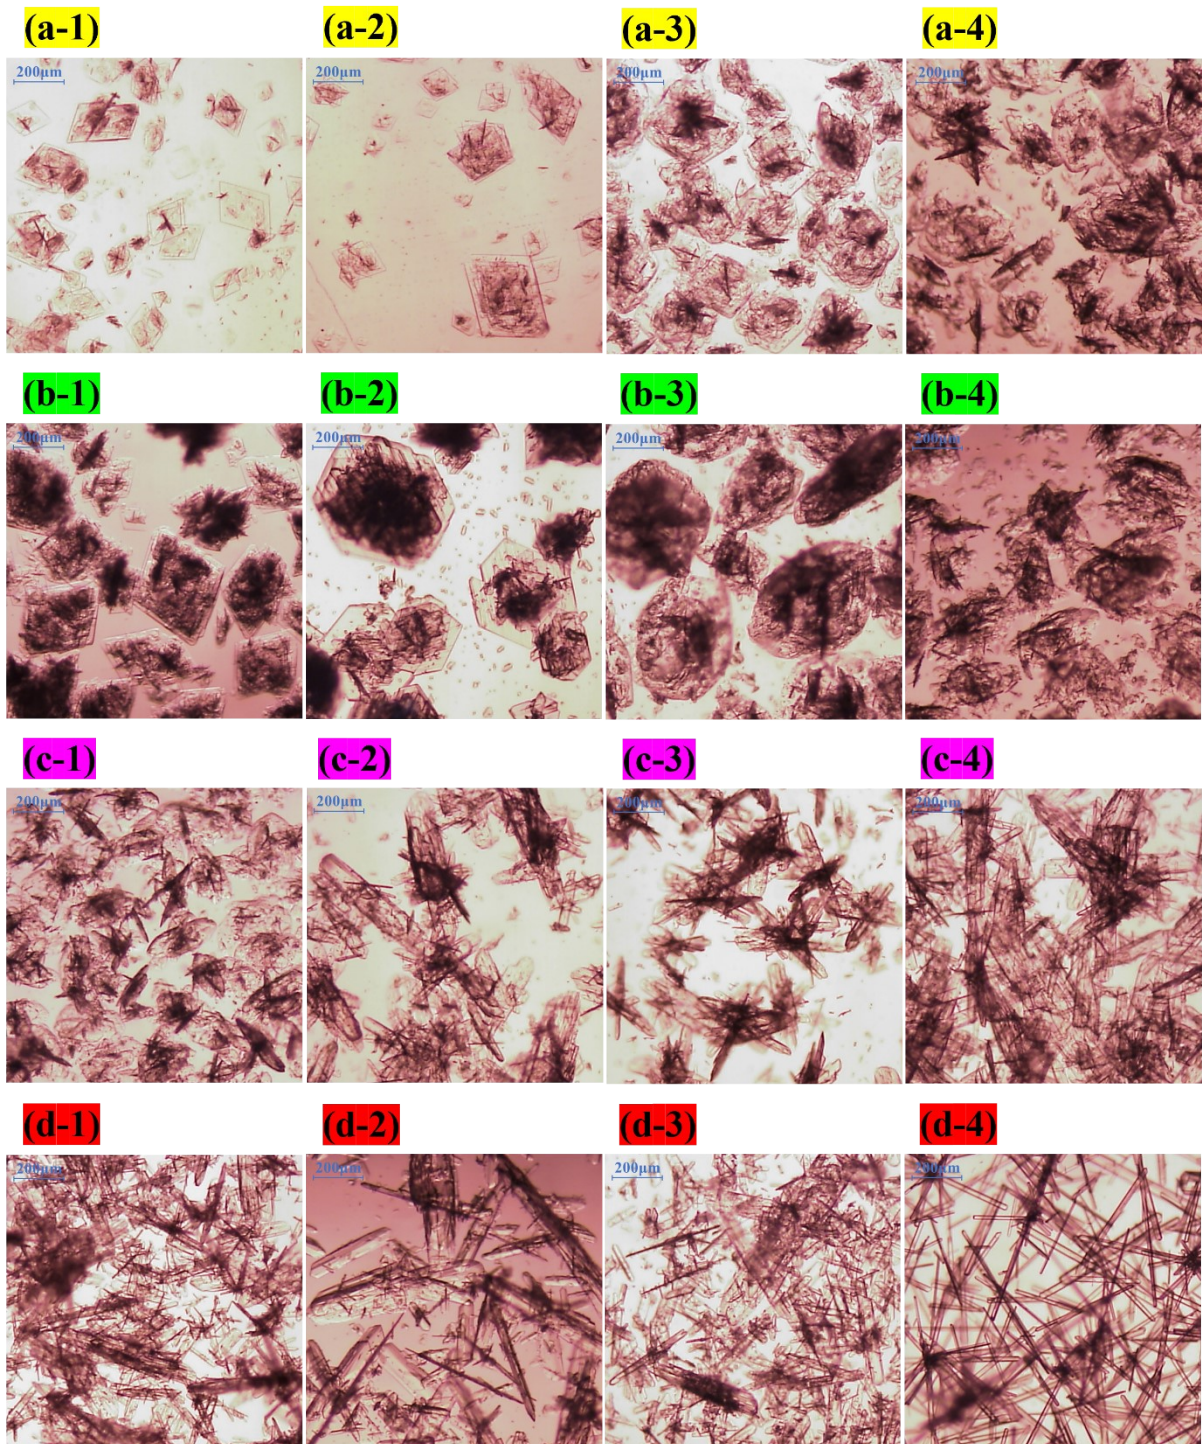

### Supplementary Information 4.

Temperature profile according to method of cooling control

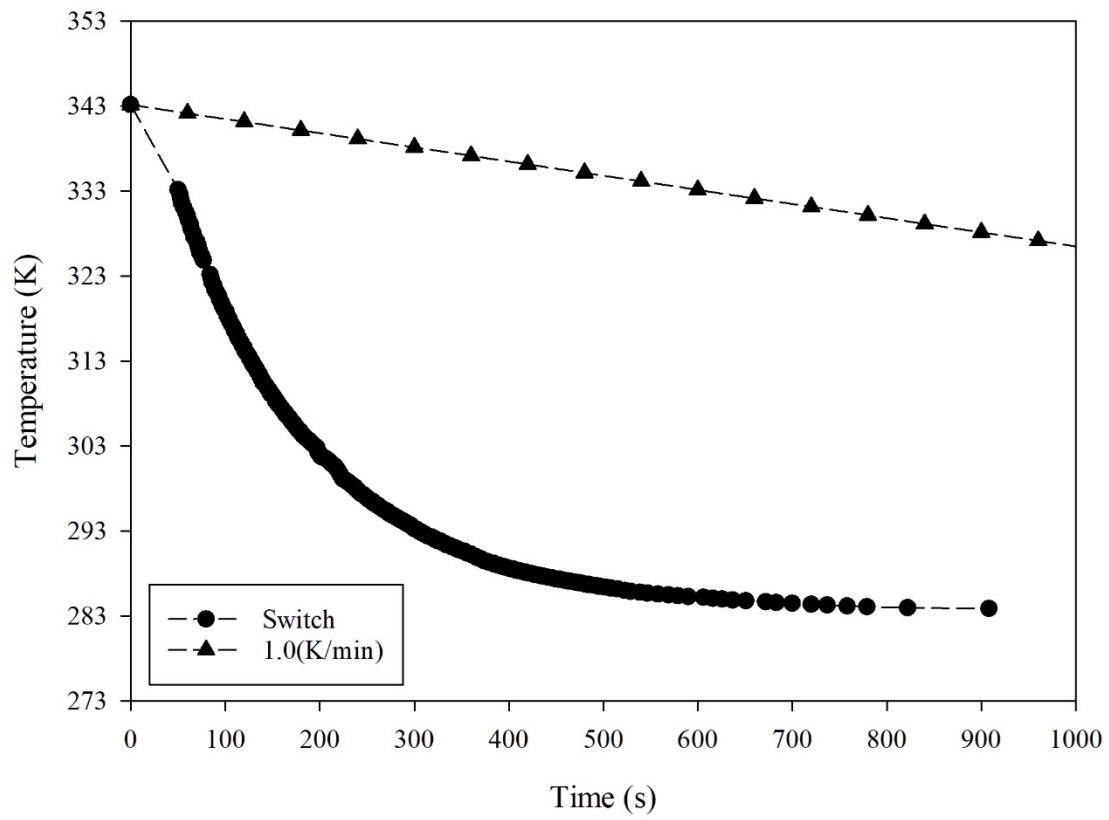

Supplement: d4ra05935b1.pdf [file d4ra05935b1.pdf]
